# Supplementary material for: Tumor-suppressive circRHOBTB3 is excreted out of cells via exosome to sustain colorectal cancer cell fitness
Source: Springer Nature journal article supplement (doi:10.1186/s12943-022-01511-1), 2022-02-11

**A**

| IRES Elements                                                                                                                                                                                                                        |              |                       |
|--------------------------------------------------------------------------------------------------------------------------------------------------------------------------------------------------------------------------------------|--------------|-----------------------|
| Position                                                                                                                                                                                                                             | R Score      | With Pseudoknot (Y/N) |
| 266--412                                                                                                                                                                                                                             | 1.611905     | Y                     |
| 271--405                                                                                                                                                                                                                             | 1.582135     | Y                     |
| Open Reading Frame (ORF)                                                                                                                                                                                                             |              |                       |
| Start Position                                                                                                                                                                                                                       | End Position | Protein Length        |
| 455                                                                                                                                                                                                                                  | 2r+18        | 173 aa                |
| <p>MHFKNTRKEK MPVLKAEASH YNSDLNLLLF CCQCVDVVFY NPNLKKVVEA HKIVLCAVSH<br/>           VFMLLFNWKS PTDIQDSSII RTTQDLFAIN RDTAFPGASH ESSGNPPLRV IVKDALFCSG<br/>           LSDILRFIYS GAFQWEELEE DIRKCLKDSG DVSNVIEKVK CILKTPGKKK CLS*</p> |              |                       |
| <p>Note: (1). nr represents n rounds (n&lt;3); (2). * represents a stop codon.</p>                                                                                                                                                   |              |                       |

**B**

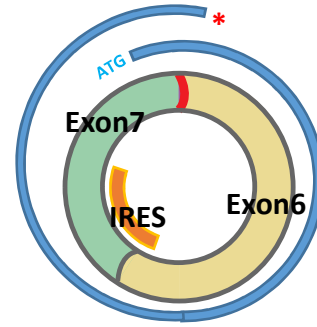

**C**

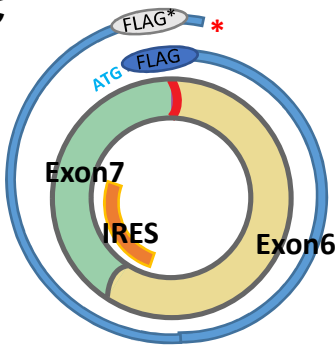

**D**

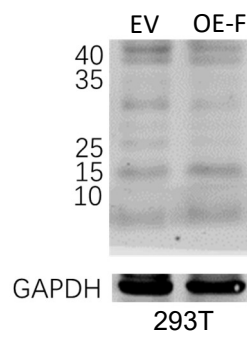

**E**

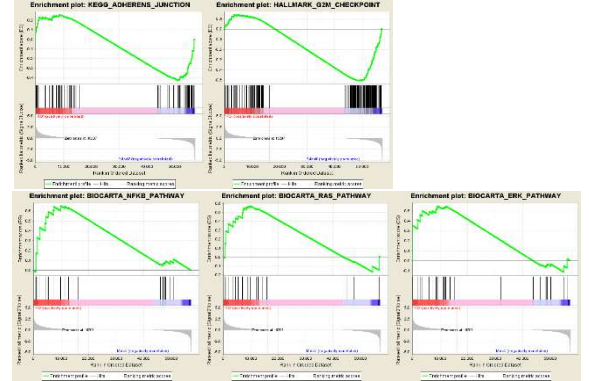

**F**

Genes up-regulated by circRHOBTB3 KO

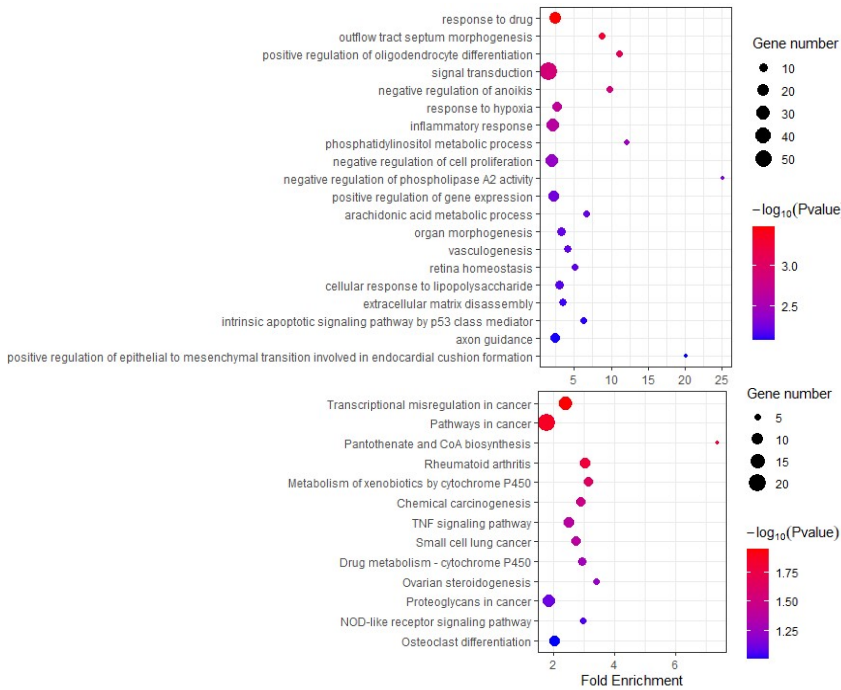

Genes down-regulated by circRHOBTB3 KO

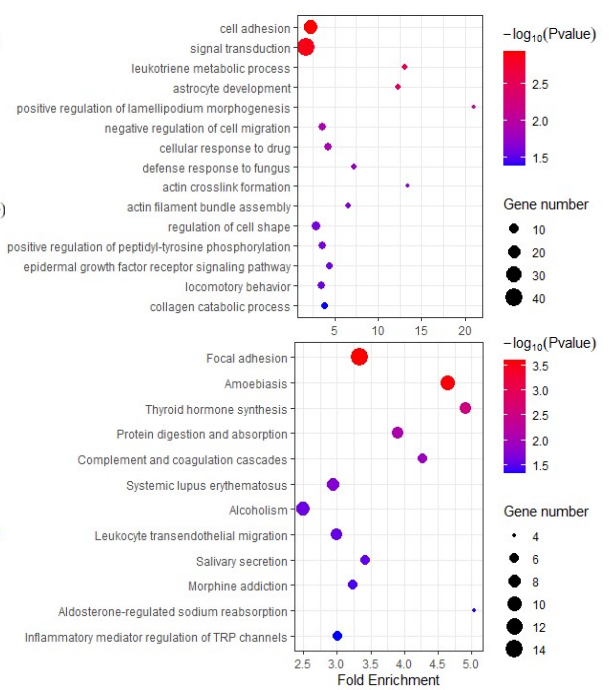

Supplement: MOESM5 [file 20126206]
