# Supplementary material for: Tumor-suppressive circRHOBTB3 is excreted out of cells via exosome to sustain colorectal cancer cell fitness
Source: Springer Nature journal article supplement (doi:10.1186/s12943-022-01511-1), 2022-02-11

A

| Series    | total | type   | sequencing platform |
|-----------|-------|--------|---------------------|
| GSE100063 | 12    | CRC    | Illumina HiSeq 2000 |
| GSE100207 | 21    | HCC    | Illumina HiSeq 2000 |
| GSE100232 | 14    | PAAD   | Illumina HiSeq 2000 |
| GSE100206 | 32    | Normal | Illumina HiSeq 2000 |

B

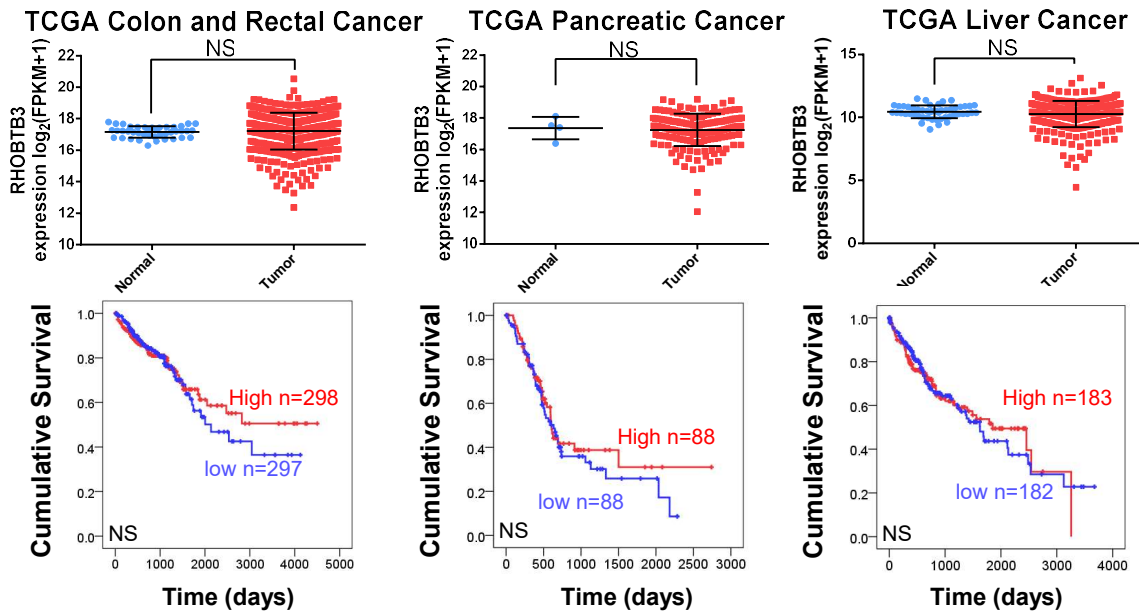

Supplement: MOESM1 [file 20126206]
