# Supplementary material for: Tumor-suppressive circRHOBTB3 is excreted out of cells via exosome to sustain colorectal cancer cell fitness
Source: Springer Nature journal article supplement (doi:10.1186/s12943-022-01511-1), 2022-02-11

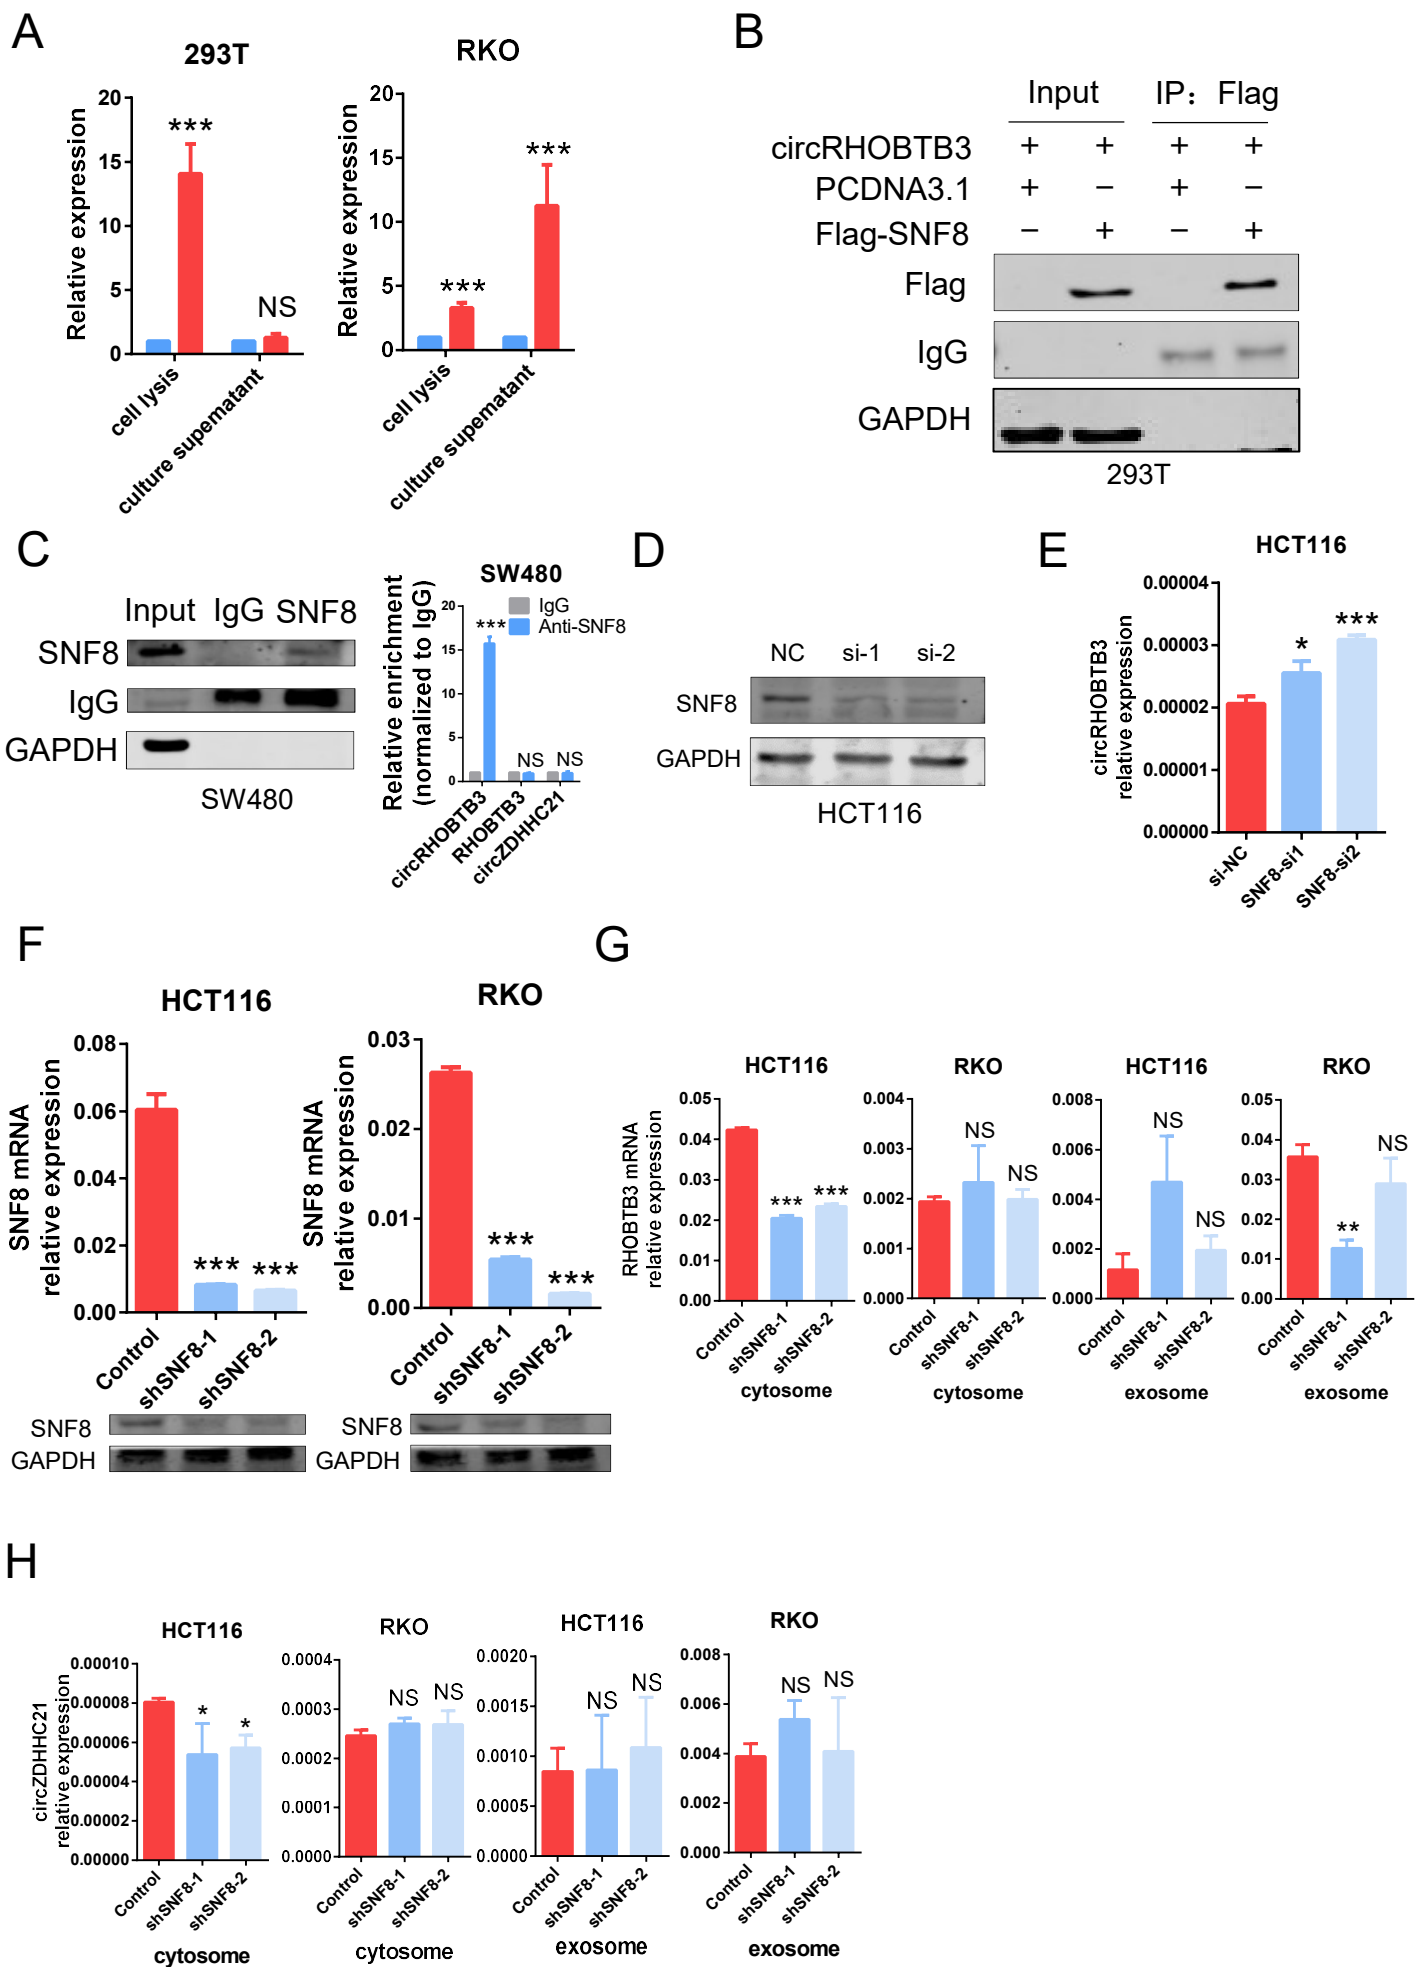

Supplement: MOESM8 [file 20126206]
